# Supplementary material for: Lasing behavior of surface functionalized carbon quantum dot/RhB composites
Source: Royal Society of Chemistry journal article supplement (doi:10.1039/c7nr01260h), 2017-01-01
Supplement: c7nr01260h1.pdf [file c7nr01260h1.pdf]

## Lasing behavior of surface functionalized carbon quantum dots/RhB composite

(Supporting Information)

Ashish Yadav<sup>a§</sup>, Liang Bai<sup>a§</sup>, Yanmei Yang<sup>a</sup>, Juan Liu<sup>a</sup>, Ajeet Kaushik<sup>b</sup> Gary J. Cheng<sup>c,d</sup>, Lin Jiang<sup>a\*</sup>, Lifeng Chi<sup>a\*</sup> Zhenhui Kang<sup>a\*</sup>

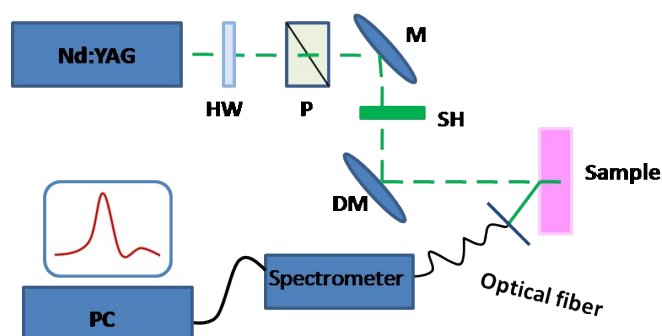

**Fig. S1** Sketch of the experimental set-up used in laser emission studies. HW is a half wave plate, P a Glan-Taylor polarizer, M a mirror, SH a frequency doubling crystal, DM a dichroic mirror, N a 532 nm-notch filter connected, by means of a lens-coupled optical fiber-bundle, to the spectrometer for the luminescence detection.

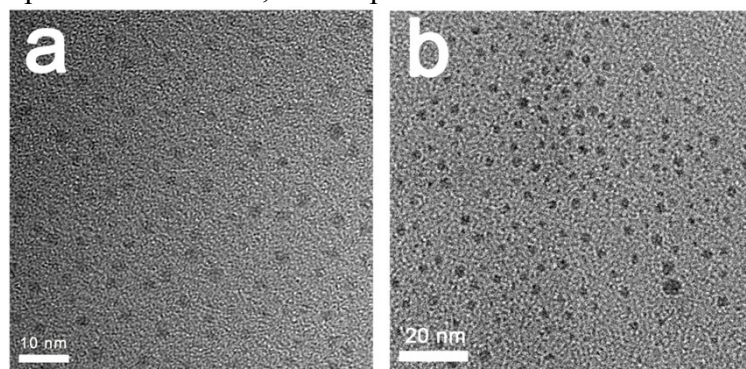

**Fig. S2** TEM images of a) OH-CQDs and b) NH<sub>2</sub>-CQDs.

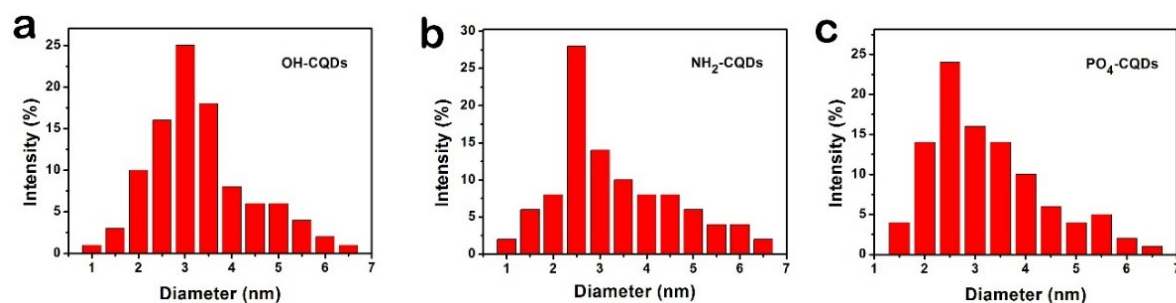

**Fig. S3.** Particle-size histogram of a) OH-CQDs, b) NH<sub>2</sub>-CQDs, c) PO<sub>4</sub>-CQDs.

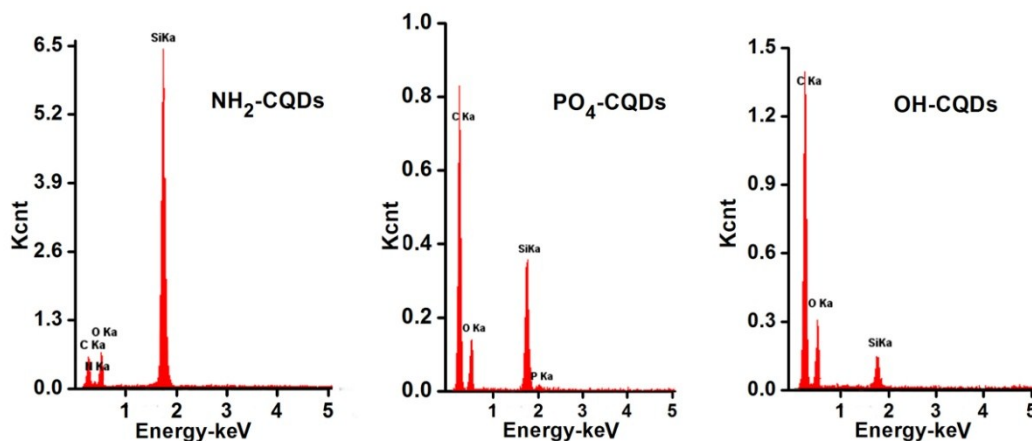

**Fig. S4** The Energy Dispersive X-ray Spectroscopy (EDS) analysis of  $\text{NH}_2\text{-CQDs}$ ,  $\text{PO}_4\text{-CQDs}$  and  $\text{OH-CQDs}$ .

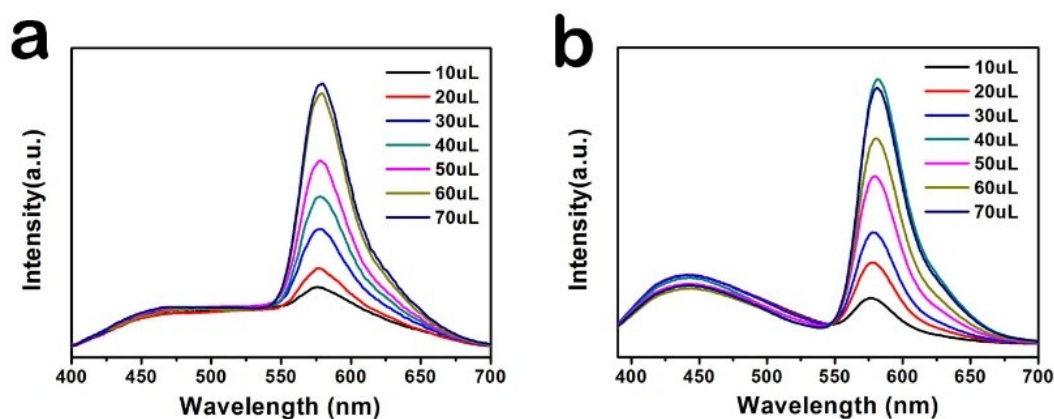

**Fig. S4.** Partical-size histogram of a)  $\text{OH-CQDs}$ , b)  $\text{NH}_2\text{-CQDs}$ , c)  $\text{PO}_4\text{-CQDs}$ . Fluorescence spectra of different amount of 0.5 mg/mL RhB solution in  $\text{OH-CQDs}$  solution and b) in  $\text{NH}_2\text{-CQDs}$  solution with the excitation wavelength of 365 nm.

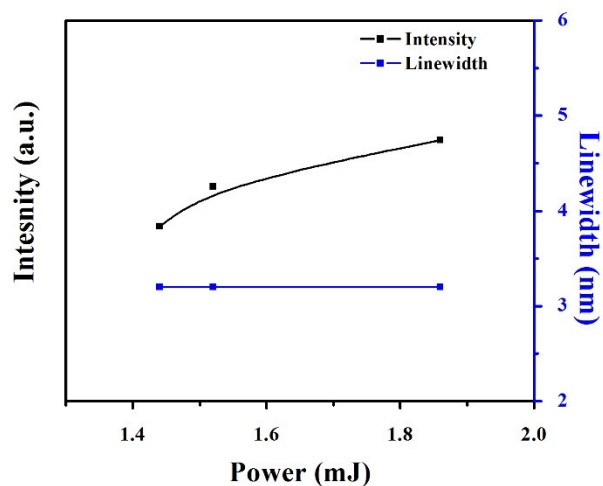

**Fig. S5.** The relationship of fluorescence intensity and linewidth of b)  $\text{PO}_4\text{-CQDs/RhB}$  composite with the input energy of 1.42, 1.52 and 1.68 mJ

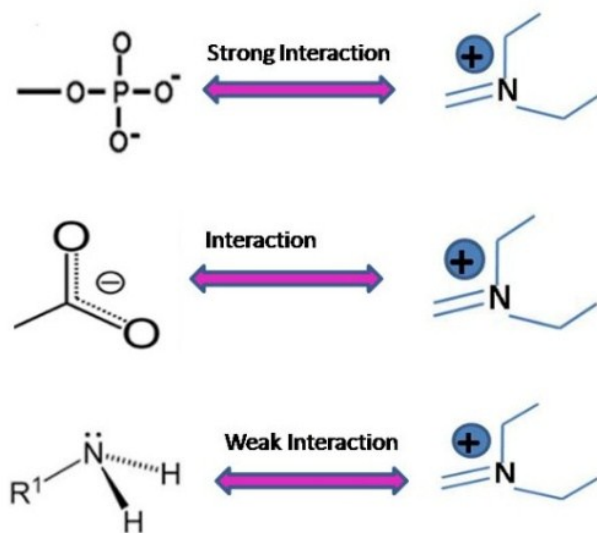

**Fig. S6.** Scheme of interaction between RhB dye molecules and CQDs.
